# Supplementary material for: Efficient Computation of Multiscale Entropy over Short Biomedical Time Series Based on Linear State-Space Models
Source: Hindawi journal article supplement (doi:10.1155/2017/1768264), 2017-01-01
Supplement: f1 [file 1768264.f1.zip]

Archive with 19 entries (18 files):
- 1768264.f1/
- 1768264.f1/ar2mse.m
- 1768264.f1/choldiag.m
- 1768264.f1/example.txt
- 1768264.f1/idMVAR.m
- 1768264.f1/InstModelfilter.m
- 1768264.f1/iss_ds.m
- 1768264.f1/iss_PV.m
- 1768264.f1/its_buildvectors.m
- 1768264.f1/its_CEker.m
- 1768264.f1/its_SetLag.m
- 1768264.f1/mos_idMVAR.m
- 1768264.f1/MVARfilter.m
- 1768264.f1/readme.txt
- 1768264.f1/ss2iss.m
- 1768264.f1/testMSE_cardiovascular.m
- 1768264.f1/testMSE_estimate.m
- 1768264.f1/testMSE_exact.m
- 1768264.f1/varma2iss.m
