# Supplementary material for: Efficient Computation of Multiscale Entropy over Short Biomedical Time Series Based on Linear State-Space Models
Source: Hindawi journal article supplement (doi:10.1155/2017/1768264), 2017-01-01
Supplement: f1 [file 1768264.f1.zip › 1768264.f1/example.txt]

   1.1800000e+02   7.8000000e+01   7.9100000e+02   4.1380000e-01
   1.1900000e+02   8.1000000e+01   7.5400000e+02   6.0060000e-01
   1.2300000e+02   8.3000000e+01   7.8300000e+02   1.5140000e-01
   1.2500000e+02   7.5000000e+01   1.1740000e+03  -2.1730000e-01
   1.2200000e+02   7.6000000e+01   9.7800000e+02  -2.6610000e-01
   1.2100000e+02   7.6000000e+01   9.0400000e+02   2.5600000e-02
   1.1800000e+02   7.7000000e+01   8.2600000e+02   5.2000000e-01
   1.1900000e+02   7.9000000e+01   7.6700000e+02   7.3120000e-01
   1.2200000e+02   8.0000000e+01   7.6600000e+02   2.5760000e-01
   1.2300000e+02   7.9000000e+01   8.6100000e+02  -9.5200000e-02
   1.2400000e+02   7.6000000e+01   9.8400000e+02  -3.3570000e-01
   1.2300000e+02   7.4000000e+01   9.9000000e+02  -3.3450000e-01
   1.1900000e+02   7.3000000e+01   8.6400000e+02   6.1000000e-03
   1.1600000e+02   7.6000000e+01   7.5200000e+02   5.2120000e-01
   1.1800000e+02   7.9000000e+01   7.2400000e+02   7.9100000e-01
   1.2200000e+02   8.2000000e+01   7.4000000e+02   2.9540000e-01
   1.2500000e+02   8.1000000e+01   8.5800000e+02  -1.5140000e-01
   1.2700000e+02   7.5000000e+01   1.1670000e+03  -3.5890000e-01
   1.2400000e+02   7.6000000e+01   1.0070000e+03  -2.8560000e-01
   1.2000000e+02   7.8000000e+01   8.2600000e+02   1.6720000e-01
   1.1900000e+02   8.0000000e+01   7.4500000e+02   5.8840000e-01
   1.2200000e+02   8.1000000e+01   7.5600000e+02   5.3340000e-01
   1.2500000e+02   8.3000000e+01   7.7900000e+02   6.8400000e-02
   1.2700000e+02   8.3000000e+01   8.0600000e+02  -2.1360000e-01
   1.2800000e+02   8.0000000e+01   9.3000000e+02  -3.0270000e-01
   1.2600000e+02   7.7000000e+01   9.8600000e+02  -2.8320000e-01
   1.2200000e+02   7.7000000e+01   8.5500000e+02   6.4700000e-02
   1.2000000e+02   7.9000000e+01   7.5300000e+02   4.8340000e-01
   1.2000000e+02   7.9000000e+01   7.3500000e+02   5.4930000e-01
   1.2300000e+02   8.0000000e+01   7.3100000e+02   6.4700000e-02
   1.2300000e+02   8.2000000e+01   7.3200000e+02  -1.8920000e-01
   1.2500000e+02   8.2000000e+01   7.4700000e+02  -2.8080000e-01
   1.2500000e+02   8.4000000e+01   6.9700000e+02  -2.4660000e-01
   1.2500000e+02   8.3000000e+01   7.0400000e+02  -1.6480000e-01
   1.2400000e+02   8.0000000e+01   7.3300000e+02   1.8310000e-01
   1.2300000e+02   8.0000000e+01   7.2400000e+02   5.8840000e-01
   1.2300000e+02   7.8000000e+01   7.5200000e+02   8.7890000e-01
   1.2300000e+02   7.6000000e+01   7.9300000e+02   3.8940000e-01
   1.2200000e+02   7.5000000e+01   8.0700000e+02  -1.0500000e-01
   1.2000000e+02   7.4000000e+01   8.0300000e+02  -3.0520000e-01
   1.1900000e+02   7.5000000e+01   7.6000000e+02  -2.9180000e-01
   1.1800000e+02   7.5000000e+01   7.1500000e+02  -1.0130000e-01
   1.1500000e+02   7.6000000e+01   7.0200000e+02   1.8680000e-01
   1.1600000e+02   7.8000000e+01   6.7300000e+02   5.2610000e-01
   1.1700000e+02   7.8000000e+01   6.6600000e+02   8.4350000e-01
   1.2000000e+02   7.9000000e+01   6.7700000e+02   5.0290000e-01
   1.2300000e+02   8.0000000e+01   7.0100000e+02   2.6900000e-02
   1.2300000e+02   7.9000000e+01   7.5700000e+02  -2.2340000e-01
   1.2200000e+02   7.7000000e+01   7.9200000e+02  -3.1010000e-01
   1.2000000e+02   7.6000000e+01   7.7900000e+02  -2.8080000e-01
   1.1800000e+02   7.6000000e+01   7.4100000e+02   7.5700000e-02
   1.1700000e+02   7.6000000e+01   7.0400000e+02   4.0770000e-01
   1.1700000e+02   7.7000000e+01   7.0400000e+02   5.9810000e-01
   1.1800000e+02   7.6000000e+01   7.1400000e+02   1.4160000e-01
   1.1800000e+02   7.6000000e+01   7.1400000e+02  -2.0020000e-01
   1.1800000e+02   7.5000000e+01   7.4900000e+02  -3.3320000e-01
   1.1700000e+02   7.4000000e+01   7.6000000e+02  -2.9660000e-01
   1.1500000e+02   7.5000000e+01   7.1500000e+02  -9.4000000e-02
   1.1500000e+02   7.4000000e+01   7.0000000e+02   2.6730000e-01
   1.1500000e+02   7.5000000e+01   6.8300000e+02   6.3110000e-01
   1.1500000e+02   7.5000000e+01   6.9700000e+02   8.3370000e-01
   1.1700000e+02   7.5000000e+01   7.3200000e+02   4.4430000e-01
   1.1800000e+02   7.3000000e+01   7.8000000e+02   1.9500000e-02
   1.1600000e+02   7.3000000e+01   7.9500000e+02  -2.1120000e-01
   1.1500000e+02   7.4000000e+01   7.7100000e+02  -2.9300000e-01
   1.1600000e+02   7.6000000e+01   7.4800000e+02  -2.0020000e-01
   1.1500000e+02   7.6000000e+01   7.2700000e+02   2.6730000e-01
   1.1500000e+02   7.6000000e+01   7.1600000e+02   7.5560000e-01
   1.1700000e+02   7.8000000e+01   7.3900000e+02   5.4560000e-01
   1.1900000e+02   7.7000000e+01   7.7100000e+02   8.5000000e-03
   1.2000000e+02   7.7000000e+01   7.7600000e+02  -2.2580000e-01
   1.2000000e+02   7.8000000e+01   7.9600000e+02  -2.7340000e-01
   1.2000000e+02   7.8000000e+01   7.9500000e+02  -2.2460000e-01
   1.2000000e+02   7.7000000e+01   7.9700000e+02  -1.8070000e-01
   1.1800000e+02   7.8000000e+01   7.5400000e+02   9.2800000e-02
   1.1800000e+02   7.8000000e+01   7.3900000e+02   5.8100000e-01
   1.1900000e+02   7.7000000e+01   7.6400000e+02   2.0260000e-01
   1.2000000e+02   7.5000000e+01   7.9800000e+02  -9.6400000e-02
   1.1800000e+02   7.4000000e+01   7.9900000e+02  -1.9160000e-01
   1.1800000e+02   7.5000000e+01   7.7900000e+02  -1.6480000e-01
   1.1600000e+02   7.5000000e+01   7.6200000e+02  -1.2570000e-01
   1.1500000e+02   7.7000000e+01   7.2800000e+02   8.5000000e-03
   1.1600000e+02   7.6000000e+01   7.6900000e+02   1.9530000e-01
   1.1800000e+02   7.7000000e+01   7.8200000e+02  -7.8100000e-02
   1.1900000e+02   7.7000000e+01   8.2500000e+02  -8.1800000e-02
   1.1800000e+02   7.8000000e+01   7.6300000e+02  -1.3400000e-02
   1.1900000e+02   7.9000000e+01   7.5600000e+02  -1.5900000e-02
   1.2000000e+02   7.5000000e+01   8.6500000e+02   0.0000000e+00
   1.1700000e+02   7.4000000e+01   8.2600000e+02   3.0520000e-01
   1.1500000e+02   7.5000000e+01   7.7300000e+02   6.3840000e-01
   1.1700000e+02   7.5000000e+01   7.8100000e+02   2.6000000e-01
   1.1700000e+02   7.5000000e+01   8.1900000e+02  -5.4900000e-02
   1.1800000e+02   7.6000000e+01   8.4300000e+02  -7.3200000e-02
   1.1800000e+02   7.5000000e+01   8.5400000e+02  -2.9300000e-02
   1.1900000e+02   7.5000000e+01   8.6500000e+02   2.4000000e-03
   1.1800000e+02   7.7000000e+01   8.0700000e+02   1.6230000e-01
   1.1800000e+02   7.9000000e+01   7.6500000e+02   5.2000000e-01
   1.2100000e+02   8.0000000e+01   7.7200000e+02   6.0670000e-01
   1.2200000e+02   8.0000000e+01   8.1500000e+02   1.4280000e-01
   1.2400000e+02   7.7000000e+01   9.7400000e+02  -1.0990000e-01
   1.2300000e+02   7.5000000e+01   1.0090000e+03  -8.0600000e-02
   1.2000000e+02   7.6000000e+01   8.9200000e+02   1.6850000e-01
   1.1900000e+02   7.8000000e+01   7.8800000e+02   5.1880000e-01
   1.2000000e+02   8.0000000e+01   7.6600000e+02   2.3440000e-01
   1.2200000e+02   8.0000000e+01   8.0500000e+02  -5.1300000e-02
   1.2400000e+02   7.9000000e+01   9.0900000e+02  -1.6360000e-01
   1.2500000e+02   7.9000000e+01   9.0100000e+02  -1.4280000e-01
   1.2300000e+02   7.9000000e+01   8.4100000e+02   1.8680000e-01
   1.2300000e+02   8.0000000e+01   8.2300000e+02   5.9570000e-01
   1.2400000e+02   8.0000000e+01   8.1900000e+02   2.0630000e-01
   1.2500000e+02   7.9000000e+01   8.7600000e+02  -1.0130000e-01
   1.2500000e+02   7.8000000e+01   8.9300000e+02  -1.3920000e-01
   1.2300000e+02   7.8000000e+01   8.3200000e+02   9.4000000e-02
   1.2100000e+02   8.0000000e+01   7.6900000e+02   4.0770000e-01
   1.2400000e+02   8.2000000e+01   7.5600000e+02   2.6980000e-01
   1.2600000e+02   8.2000000e+01   8.1400000e+02  -6.9600000e-02
   1.2700000e+02   8.2000000e+01   8.5600000e+02  -1.6850000e-01
   1.2800000e+02   8.2000000e+01   8.7200000e+02  -1.1720000e-01
   1.2600000e+02   8.1000000e+01   8.0900000e+02   2.6730000e-01
   1.2500000e+02   8.2000000e+01   7.8000000e+02   7.3730000e-01
   1.2500000e+02   8.2000000e+01   7.5700000e+02   1.1243000e+00
   1.2600000e+02   8.2000000e+01   7.7000000e+02   6.2870000e-01
   1.2700000e+02   7.9000000e+01   8.6500000e+02   5.3700000e-02
   1.2600000e+02   7.9000000e+01   8.4600000e+02  -2.3190000e-01
   1.2500000e+02   7.9000000e+01   8.2100000e+02  -2.0750000e-01
   1.2200000e+02   7.9000000e+01   7.9500000e+02   1.2570000e-01
   1.2200000e+02   8.0000000e+01   7.3800000e+02   5.0050000e-01
   1.2300000e+02   8.0000000e+01   7.3600000e+02   6.5430000e-01
   1.2500000e+02   8.1000000e+01   7.5800000e+02   1.6480000e-01
   1.2500000e+02   8.1000000e+01   7.8900000e+02  -1.6480000e-01
   1.2500000e+02   7.9000000e+01   8.2400000e+02  -2.5020000e-01
   1.2400000e+02   7.7000000e+01   8.2300000e+02  -2.1360000e-01
   1.2100000e+02   7.6000000e+01   7.9700000e+02   1.0250000e-01
   1.1900000e+02   7.7000000e+01   7.5200000e+02   3.9670000e-01
   1.1900000e+02   7.7000000e+01   7.5100000e+02   6.8360000e-01
   1.2000000e+02   7.8000000e+01   7.3400000e+02   3.1370000e-01
   1.2000000e+02   7.9000000e+01   7.3900000e+02  -9.1600000e-02
   1.2100000e+02   8.0000000e+01   7.5700000e+02  -2.8080000e-01
   1.2100000e+02   7.8000000e+01   8.1700000e+02  -3.1010000e-01
   1.2100000e+02   7.7000000e+01   8.0000000e+02  -1.8800000e-01
   1.1900000e+02   7.7000000e+01   7.7800000e+02   1.3670000e-01
   1.1900000e+02   7.8000000e+01   7.3100000e+02   4.9190000e-01
   1.1900000e+02   7.8000000e+01   7.2300000e+02   7.6780000e-01
   1.2100000e+02   8.0000000e+01   7.3000000e+02   4.1020000e-01
   1.2200000e+02   7.9000000e+01   7.6200000e+02   4.4000000e-02
   1.2200000e+02   7.8000000e+01   8.0200000e+02  -1.7820000e-01
   1.2200000e+02   7.7000000e+01   8.0400000e+02  -2.6610000e-01
   1.2100000e+02   7.6000000e+01   8.1600000e+02  -2.5270000e-01
   1.1900000e+02   7.4000000e+01   8.0700000e+02  -2.2100000e-01
   1.1700000e+02   7.4000000e+01   7.8700000e+02  -1.6850000e-01
   1.1600000e+02   7.3000000e+01   7.5900000e+02  -1.1350000e-01
   1.1400000e+02   7.5000000e+01   7.1200000e+02   1.5500000e-01
   1.1400000e+02   7.6000000e+01   6.9500000e+02   5.3340000e-01
   1.1700000e+02   7.9000000e+01   6.8800000e+02   9.0580000e-01
   1.2000000e+02   8.1000000e+01   6.9800000e+02   4.9800000e-01
   1.2200000e+02   8.2000000e+01   7.3300000e+02   4.4000000e-02
   1.2300000e+02   8.0000000e+01   7.8800000e+02  -1.5140000e-01
   1.2300000e+02   8.1000000e+01   7.6200000e+02  -1.5020000e-01
   1.2200000e+02   8.3000000e+01   7.0300000e+02  -1.0990000e-01
   1.2000000e+02   8.0000000e+01   7.4200000e+02   0.0000000e+00
   1.2000000e+02   7.9000000e+01   7.4300000e+02   1.8070000e-01
   1.1900000e+02   7.8000000e+01   7.3300000e+02   5.4690000e-01
   1.1900000e+02   7.8000000e+01   7.4600000e+02   5.9810000e-01
   1.2100000e+02   7.7000000e+01   7.9000000e+02   1.5870000e-01
   1.2000000e+02   7.6000000e+01   7.8300000e+02  -1.5020000e-01
   1.1900000e+02   7.5000000e+01   8.1400000e+02  -2.0140000e-01
   1.1800000e+02   7.4000000e+01   8.2400000e+02  -1.1480000e-01
   1.1600000e+02   7.3000000e+01   7.7500000e+02   1.9780000e-01
   1.1500000e+02   7.3000000e+01   7.4900000e+02   4.9800000e-01
   1.1500000e+02   7.5000000e+01   7.3700000e+02   4.6880000e-01
   1.1600000e+02   7.5000000e+01   7.3900000e+02   8.5000000e-03
   1.1700000e+02   7.4000000e+01   7.8500000e+02  -2.0020000e-01
   1.1800000e+02   7.6000000e+01   8.0400000e+02  -2.2460000e-01
   1.1700000e+02   7.5000000e+01   8.0100000e+02  -1.6360000e-01
   1.1700000e+02   7.5000000e+01   7.8700000e+02   1.8190000e-01
   1.1700000e+02   7.6000000e+01   7.6400000e+02   4.4680000e-01
   1.1800000e+02   7.7000000e+01   7.5500000e+02   1.2940000e-01
   1.1900000e+02   7.7000000e+01   7.7400000e+02  -1.0860000e-01
   1.2000000e+02   7.6000000e+01   8.2700000e+02  -1.8920000e-01
   1.2000000e+02   7.5000000e+01   8.6700000e+02  -1.4040000e-01
   1.2000000e+02   7.7000000e+01   8.1200000e+02   8.3000000e-02
   1.1800000e+02   7.7000000e+01   7.9100000e+02   3.8210000e-01
   1.2000000e+02   7.7000000e+01   7.8400000e+02   2.8080000e-01
   1.2100000e+02   7.7000000e+01   8.0000000e+02  -1.2570000e-01
   1.2100000e+02   7.8000000e+01   7.7900000e+02  -1.7330000e-01
   1.2100000e+02   7.8000000e+01   7.7500000e+02  -1.0500000e-01
   1.2000000e+02   8.0000000e+01   7.5400000e+02   2.1970000e-01
   1.2100000e+02   8.1000000e+01   7.3400000e+02   5.3950000e-01
   1.2300000e+02   7.9000000e+01   7.9200000e+02   3.5520000e-01
   1.2400000e+02   7.8000000e+01   8.2900000e+02  -2.9300000e-02
   1.2300000e+02   7.6000000e+01   9.1300000e+02  -1.8310000e-01
   1.2200000e+02   7.2000000e+01   9.5100000e+02  -1.3790000e-01
   1.1800000e+02   7.1000000e+01   8.8500000e+02   2.2220000e-01
   1.1500000e+02   7.3000000e+01   7.7600000e+02   6.2130000e-01
   1.1600000e+02   7.6000000e+01   7.2100000e+02   2.9660000e-01
   1.1800000e+02   7.9000000e+01   6.9400000e+02  -4.0300000e-02
   1.2000000e+02   8.2000000e+01   7.1300000e+02  -1.8430000e-01
   1.2400000e+02   8.4000000e+01   7.5100000e+02  -1.4890000e-01
   1.2700000e+02   8.0000000e+01   9.7400000e+02   1.0740000e-01
   1.2700000e+02   8.0000000e+01   9.8500000e+02   5.4560000e-01
   1.2700000e+02   7.7000000e+01   1.0110000e+03   2.8930000e-01
   1.2500000e+02   7.6000000e+01   9.6700000e+02  -1.4770000e-01
   1.2200000e+02   7.5000000e+01   8.9500000e+02  -1.8310000e-01
   1.1900000e+02   7.5000000e+01   8.3200000e+02   5.7400000e-02
   1.1700000e+02   7.6000000e+01   7.6000000e+02   4.2970000e-01
   1.1800000e+02   7.9000000e+01   7.3700000e+02   7.3490000e-01
   1.2200000e+02   8.1000000e+01   7.5100000e+02   4.4560000e-01
   1.2400000e+02   7.9000000e+01   8.2400000e+02  -1.1000000e-02
   1.2500000e+02   7.7000000e+01   9.4000000e+02  -2.4780000e-01
   1.2300000e+02   7.5000000e+01   9.4200000e+02  -1.9650000e-01
   1.2000000e+02   7.6000000e+01   8.4500000e+02   2.2460000e-01
   1.1800000e+02   7.5000000e+01   7.9900000e+02   5.4200000e-01
   1.1900000e+02   7.5000000e+01   8.1700000e+02   2.1120000e-01
   1.2000000e+02   7.5000000e+01   8.4400000e+02  -1.5500000e-01
   1.2000000e+02   7.5000000e+01   8.7500000e+02  -2.5270000e-01
   1.1900000e+02   7.4000000e+01   8.5200000e+02  -1.0380000e-01
   1.1800000e+02   7.4000000e+01   8.2900000e+02   2.6490000e-01
   1.1600000e+02   7.6000000e+01   7.6000000e+02   6.1890000e-01
   1.1700000e+02   7.7000000e+01   7.6000000e+02   6.0910000e-01
   1.1900000e+02   7.5000000e+01   8.3300000e+02   1.1230000e-01
   1.2000000e+02   7.4000000e+01   8.8400000e+02  -2.6370000e-01
   1.2000000e+02   7.4000000e+01   8.8300000e+02  -3.0030000e-01
   1.1700000e+02   7.4000000e+01   8.1100000e+02  -1.7100000e-02
   1.1500000e+02   7.5000000e+01   7.6000000e+02   4.2240000e-01
   1.1500000e+02   7.6000000e+01   7.2900000e+02   7.1530000e-01
   1.1800000e+02   7.6000000e+01   7.5600000e+02   3.4790000e-01
   1.1900000e+02   7.7000000e+01   7.9200000e+02  -8.3000000e-02
   1.2000000e+02   7.5000000e+01   8.2200000e+02  -2.7830000e-01
   1.1900000e+02   7.3000000e+01   8.4800000e+02  -3.0640000e-01
   1.1800000e+02   7.3000000e+01   8.4700000e+02  -2.3930000e-01
   1.1500000e+02   7.4000000e+01   7.8700000e+02   1.2700000e-01
   1.1500000e+02   7.5000000e+01   7.4300000e+02   4.3820000e-01
   1.1600000e+02   7.7000000e+01   7.3500000e+02   6.7990000e-01
   1.2000000e+02   7.8000000e+01   7.5400000e+02   2.3680000e-01
   1.2200000e+02   7.8000000e+01   7.9100000e+02  -1.2820000e-01
   1.2300000e+02   7.4000000e+01   9.3800000e+02  -3.0400000e-01
   1.2200000e+02   7.4000000e+01   9.5200000e+02  -2.5020000e-01
   1.1700000e+02   7.5000000e+01   8.0300000e+02   2.4170000e-01
   1.1600000e+02   7.6000000e+01   7.5000000e+02   6.2010000e-01
   1.1800000e+02   7.8000000e+01   7.2500000e+02   2.9540000e-01
   1.2100000e+02   7.9000000e+01   7.4400000e+02  -9.2800000e-02
   1.2200000e+02   8.1000000e+01   7.6000000e+02  -2.7950000e-01
   1.2300000e+02   8.3000000e+01   7.4700000e+02  -2.5640000e-01
   1.2500000e+02   8.4000000e+01   7.3100000e+02  -2.1480000e-01
   1.2500000e+02   8.0000000e+01   8.4400000e+02  -3.7800000e-02
   1.2400000e+02   7.9000000e+01   8.3200000e+02   3.3690000e-01
   1.2200000e+02   7.9000000e+01   7.8000000e+02   7.3360000e-01
   1.2200000e+02   7.7000000e+01   8.1400000e+02   5.6760000e-01
   1.2200000e+02   7.4000000e+01   8.6600000e+02  -3.4200000e-02
   1.2100000e+02   7.3000000e+01   8.7500000e+02  -2.7470000e-01
   1.1800000e+02   7.3000000e+01   8.2800000e+02  -1.1720000e-01
   1.1500000e+02   7.5000000e+01   7.5700000e+02   2.9790000e-01
   1.1600000e+02   7.7000000e+01   7.2800000e+02   6.6900000e-01
   1.1800000e+02   7.8000000e+01   7.3400000e+02   4.6750000e-01
   1.2100000e+02   7.7000000e+01   7.9700000e+02   9.8000000e-03
   1.2200000e+02   7.4000000e+01   9.5600000e+02  -2.7100000e-01
   1.2100000e+02   7.3000000e+01   9.7400000e+02  -2.7100000e-01
   1.1900000e+02   7.4000000e+01   9.0100000e+02   2.8100000e-02
   1.1500000e+02   7.5000000e+01   7.9200000e+02   4.2600000e-01
   1.1500000e+02   7.6000000e+01   7.4700000e+02   6.8120000e-01
   1.1900000e+02   7.9000000e+01   7.5600000e+02   2.8200000e-01
   1.2100000e+02   7.9000000e+01   7.9000000e+02  -9.0300000e-02
   1.2300000e+02   7.6000000e+01   9.3200000e+02  -2.7710000e-01
   1.2100000e+02   7.5000000e+01   9.3100000e+02  -2.4170000e-01
   1.1900000e+02   7.6000000e+01   8.4500000e+02   1.2820000e-01
   1.1800000e+02   7.8000000e+01   7.7700000e+02   4.8830000e-01
   1.1800000e+02   7.7000000e+01   7.6900000e+02   7.1530000e-01
   1.2000000e+02   7.8000000e+01   7.8900000e+02   2.9790000e-01
   1.2100000e+02   7.5000000e+01   9.1500000e+02  -1.3310000e-01
   1.2100000e+02   7.3000000e+01   9.4000000e+02  -3.2350000e-01
   1.1800000e+02   7.4000000e+01   8.7600000e+02  -2.5880000e-01
   1.1700000e+02   7.3000000e+01   8.4500000e+02  -8.5400000e-02
   1.1500000e+02   7.6000000e+01   7.5900000e+02   2.9910000e-01
   1.1700000e+02   8.0000000e+01   7.2300000e+02   6.3230000e-01
   1.2100000e+02   8.1000000e+01   7.4900000e+02   4.7970000e-01
   1.2400000e+02   7.9000000e+01   9.0900000e+02   2.8100000e-02
   1.2500000e+02   7.6000000e+01   1.0690000e+03  -2.4780000e-01
   1.2200000e+02   7.5000000e+01   1.0030000e+03  -2.4780000e-01
   1.1900000e+02   7.6000000e+01   8.8700000e+02   8.0600000e-02
   1.1800000e+02   7.8000000e+01   7.8900000e+02   4.7610000e-01
   1.1900000e+02   8.0000000e+01   7.6200000e+02   7.7150000e-01
   1.2300000e+02   8.2000000e+01   7.8900000e+02   4.1990000e-01
   1.2500000e+02   7.7000000e+01   1.0160000e+03  -6.5900000e-02
   1.2400000e+02   7.5000000e+01   1.0820000e+03  -2.6980000e-01
   1.2200000e+02   7.5000000e+01   9.8200000e+02  -2.1730000e-01
   1.1900000e+02   7.8000000e+01   8.1000000e+02   2.0390000e-01
   1.1900000e+02   8.0000000e+01   7.3900000e+02   6.0300000e-01
   1.2100000e+02   8.3000000e+01   7.4200000e+02   7.3730000e-01
   1.2600000e+02   8.4000000e+01   8.0800000e+02   2.6490000e-01
   1.2900000e+02   7.9000000e+01   1.1320000e+03  -1.7330000e-01
   1.2700000e+02   8.0000000e+01   1.0290000e+03  -3.5520000e-01
   1.2600000e+02   7.8000000e+01   1.0090000e+03  -1.9780000e-01
   1.2200000e+02   7.6000000e+01   9.6000000e+02   2.7470000e-01
   1.2000000e+02   8.0000000e+01   7.6800000e+02   7.5440000e-01
   1.2200000e+02   8.2000000e+01   7.4600000e+02   3.5770000e-01
   1.2400000e+02   8.3000000e+01   7.8100000e+02  -1.5140000e-01
   1.2700000e+02   8.1000000e+01   8.6900000e+02  -2.9910000e-01
   1.2800000e+02   8.0000000e+01   9.5300000e+02  -2.7470000e-01
   1.2600000e+02   8.0000000e+01   9.2900000e+02   2.2000000e-02
   1.2500000e+02   8.1000000e+01   8.4700000e+02   4.3700000e-01
