# Supplementary material for: Efficient Computation of Multiscale Entropy over Short Biomedical Time Series Based on Linear State-Space Models
Source: Hindawi journal article supplement (doi:10.1155/2017/1768264), 2017-01-01
Supplement: f1 [file 1768264.f1.zip › 1768264.f1/readme.txt]

LMSE - MATLAB toolbox for the linear computation of Multiscale Entropy
based on Faes et al. 2017 [1]

Main functions:
- mscg.m: computes Granger causality at a given scale from assigned VAR parameters
- iss_PV: computes partial variances for a state space model from innovations form SS parameters
- iss_ss2iss.m: computes innovations form SS parameters from SS parameters
- iss_varma2iss.m: computes innovations form SS parameters from VARMA parameters
- iss_ds.m: computes innovations form SS parameters for a downsampled SS model

External functions
- egc_gcMVAR.m (LinReg, linReg_Ftest, SetLag, buildvectors): functions to compute standard time domain Granger Causality
- eMVAR_idMVAR.m (choldiag, InstModelFilter, mos_idMVAR, MVARfilter): functions to identify and simulate a MVAR process
- surriaaft.m (surrshuf): functions to generate IAAFT surrogates

Scripts
- testMSE_exact.m: computation of exact LMSE from true parameters of simulated AR process (realizes Fig. 1 of [1])
- testMSE_estimate.m: computation of LMSE and RMSE on multiple realizations of simulated AR process (realizes Fig. 2 of [1])
- testMSE_cardiovascular.m: computation of LMSE and RMSE on exemplary cardiovascular time series

Data:
- example.txt: example of cardiovascular time series analyzed in [1] (systolic arterial pressure, diastolic arterial pressure, RR intervals, respiration time series for a subject in the resting supine condition)


[1] L Faes, A Porta, M Javorka, D Marinazzo. Multiscale Granger causality. Complexity. 2017
